# Supplementary material for: A Novel Efficient Piscine Oral Nano-Vaccine Delivery System: Modified Halloysite Nanotubes (HNTs) Preventing Streptococcosis Disease in Tilapia (Oreochromis sp.)
Source: MDPI journal article supplement (doi:10.3390/vaccines10081180), 2022-07-25
Supplement: s1 [file s1]

## Supplementary Figures

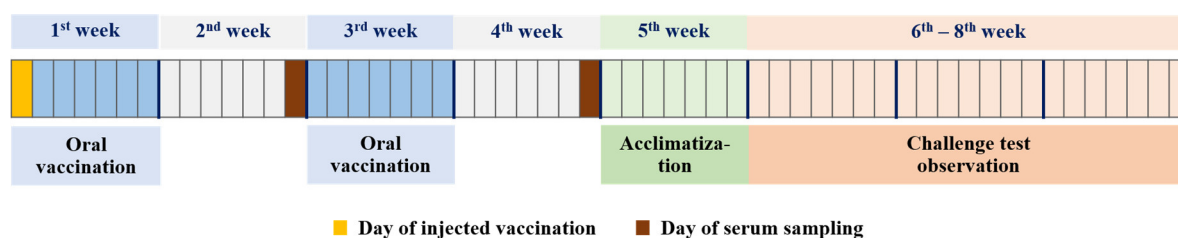

**Figure S1. The timetable represents experimental designs of vaccination and challenge test.** The oral vaccinated groups were orally fed with HNTs with and without Strep-KU1 vaccine at the 1<sup>st</sup> and 3<sup>rd</sup> week (highlighted with blue color), while the injected group was vaccinated on day 1 (designated with orange color). Meanwhile, a brown color indicates the day of serum sampling in week 2 and week 4. The experimental fish were acclimatized for a week (at week 5) as highlighted in green color. Also, an orange color represents the duration of the challenge test (at 6<sup>th</sup> to 8<sup>th</sup> week).

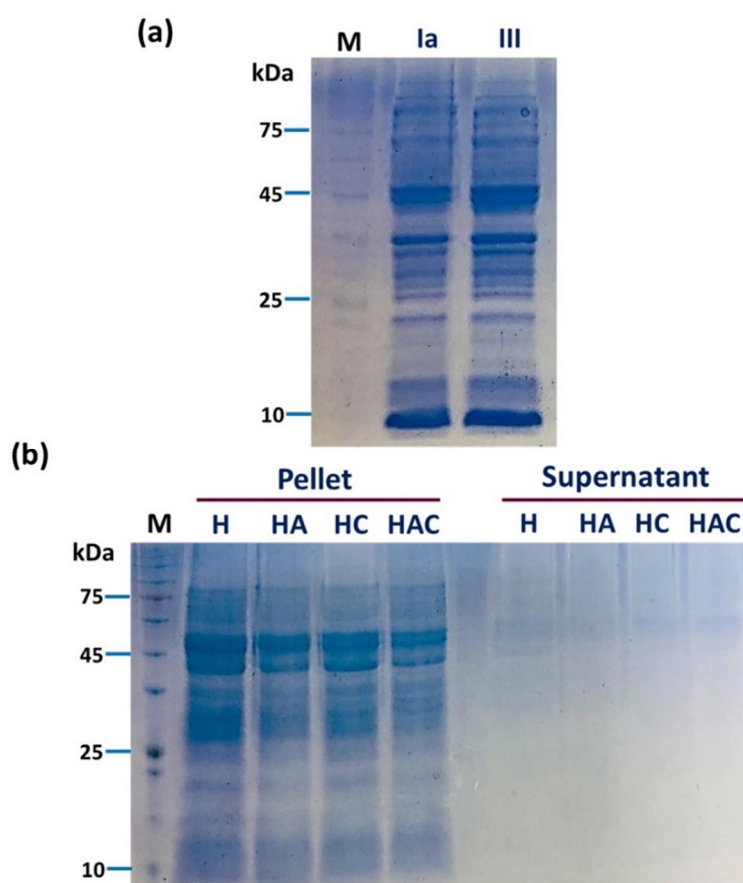

**Figure S2. Protein pattern of *S. agalactiae* protein lysate and *S. agalactiae* protein lysate-loaded HNTs.** (a) whole-cell protein profile of *S. agalactiae* serotypes Ia and III, (b) profile of the *S. agalactiae* protein lysate-loaded HNTs. Pellet represented the proteins that bound to the HNTs, supernatant exhibited the remaining proteins in solution. H, HA, HC, and HAC stranded for HNT, HNT-APTES, HNT-Chitosan, and HNT-APTES-Chitosan, respectively. (M = protein marker).

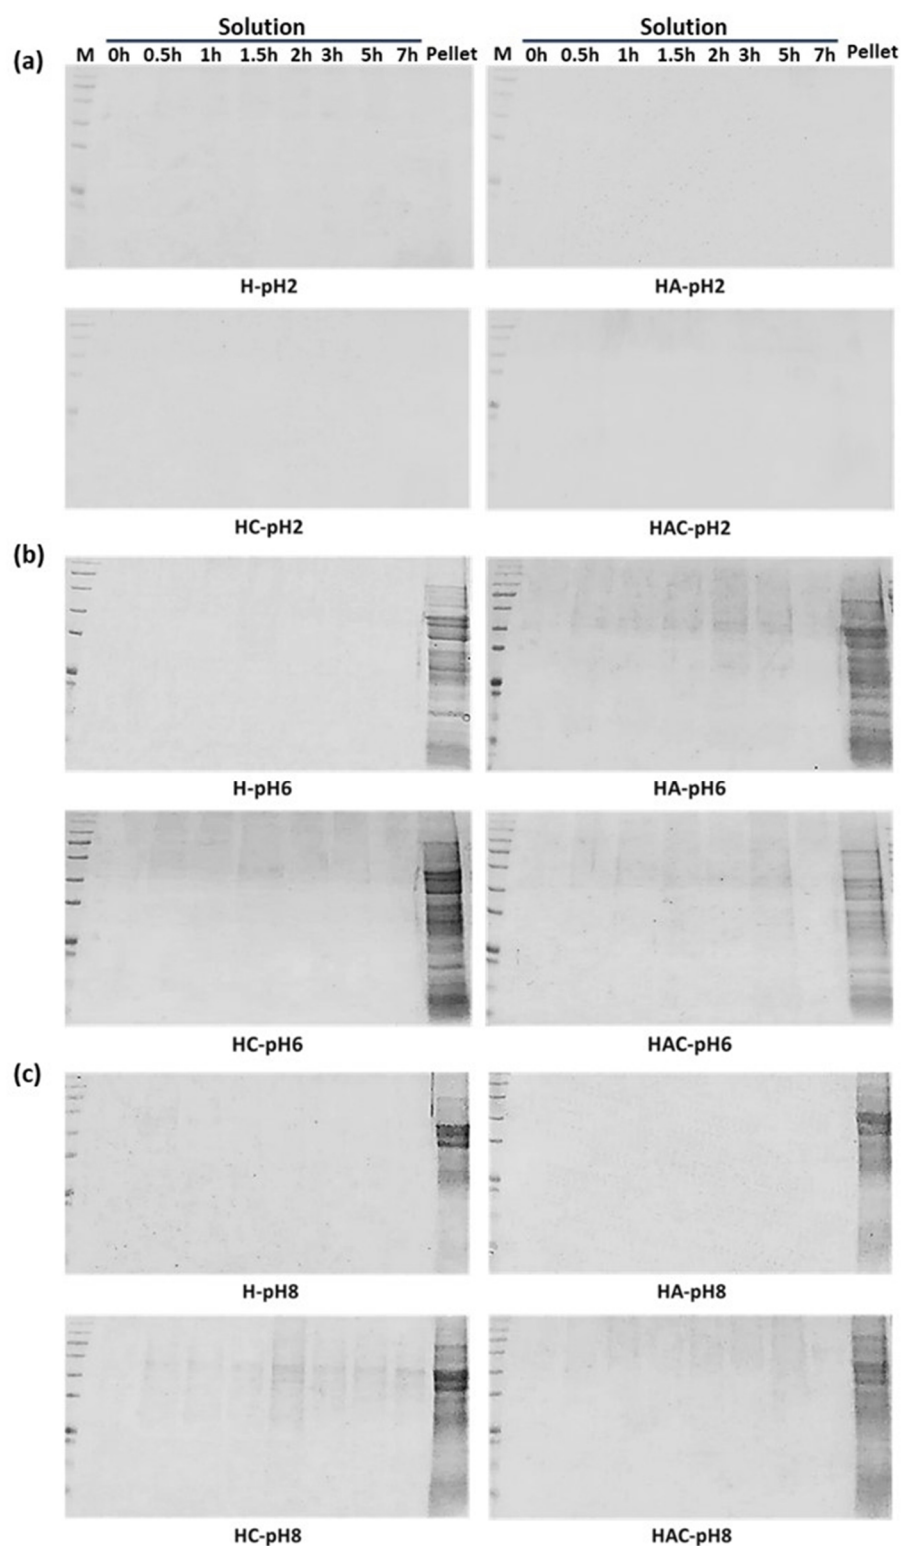

**Figure S3.** The 12% SDS-PAGE analysis showing the acid-base tolerance profile of the *S. agalactiae* protein lysate-loaded HNTs after exposure to artificial acid-base solutions. (a), (b) and (c) represented the releasing patterns at pH 2, pH 6, and pH 8, respectively. The detectable band in the solution was the releasing *S. agalactiae* protein lysate, while in the pellet was the remaining proteins on HNTs particles.

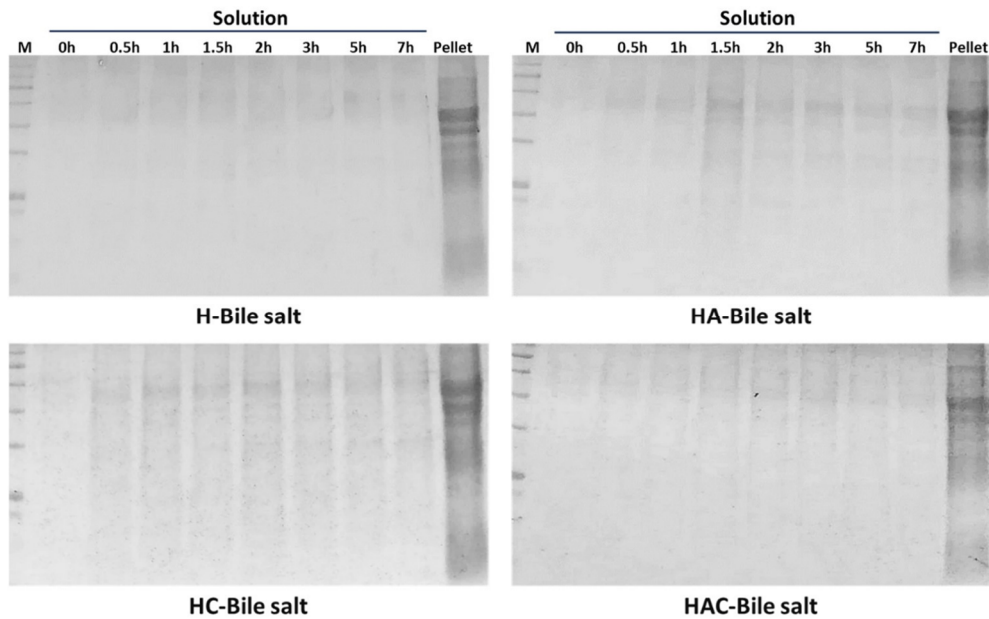

**Figure S4.** 12% SDS-PAGE analysis of the bile salt tolerance profile of the *S. agalactiae* protein lysate-loaded HNTs after 7h. The observed protein bands in the solution were the releasing Strep proteins, whereas in the pellet was the remaining proteins on HNTs.

| Week                                                  | NaCl | F    | H | HA | HC | HAC | HF | HAF  | HCF  | HACF  | Treatment |
|-------------------------------------------------------|------|------|---|----|----|-----|----|------|------|-------|-----------|
| 0                                                     | 0    | 0    | 0 | 0  | 0  | 0   | 0  | 0    | 0    | 0     |           |
| 2                                                     | 0    | 0.67 | 0 | 0  | 0  | 0   | 0  | 0.33 | 1.33 | 1     |           |
| 4                                                     | 0    | 0.33 | 0 | 0  | 0  | 0   | 0  | 0    | 0.33 | 0.167 |           |
| Average mean of antibody titer value against Strep Ia |      |      |   |    |    |     |    |      |      |       |           |

  

| Week                                                   | NaCl | F    | H | HA | HC | HAC | HF | HAF | HCF  | HACF  | Treatment |
|--------------------------------------------------------|------|------|---|----|----|-----|----|-----|------|-------|-----------|
| 0                                                      | 0    | 0    | 0 | 0  | 0  | 0   | 0  | 0   | 0    | 0     |           |
| 2                                                      | 0    | 0.67 | 0 | 0  | 0  | 0   | 0  | 0   | 0    | 0     |           |
| 4                                                      | 0    | 1.67 | 0 | 0  | 0  | 0   | 0  | 0   | 0.33 | 0.167 |           |
| Average mean of antibody titer value against Strep III |      |      |   |    |    |     |    |     |      |       |           |

**Figure S5.** The data spreadsheet of average mean value of antibody titer level against *S. agalactiae* serotype Ia and III (Strep Ia and III). F: fish injected with the StrepKU-1 vaccine marked as a positive control, NaCl: fish fed with 0.85% NaCl solution marked as a negative control. H, HA, HC, and HAC groups: fish fed with H, HA, HC, and HAC-mixed pellet, respectively. HF, HAF, HCF, HACF groups: fish fed with the StrepKU-1 loaded H-, HA-, HC- and HAC-mixed pellet.

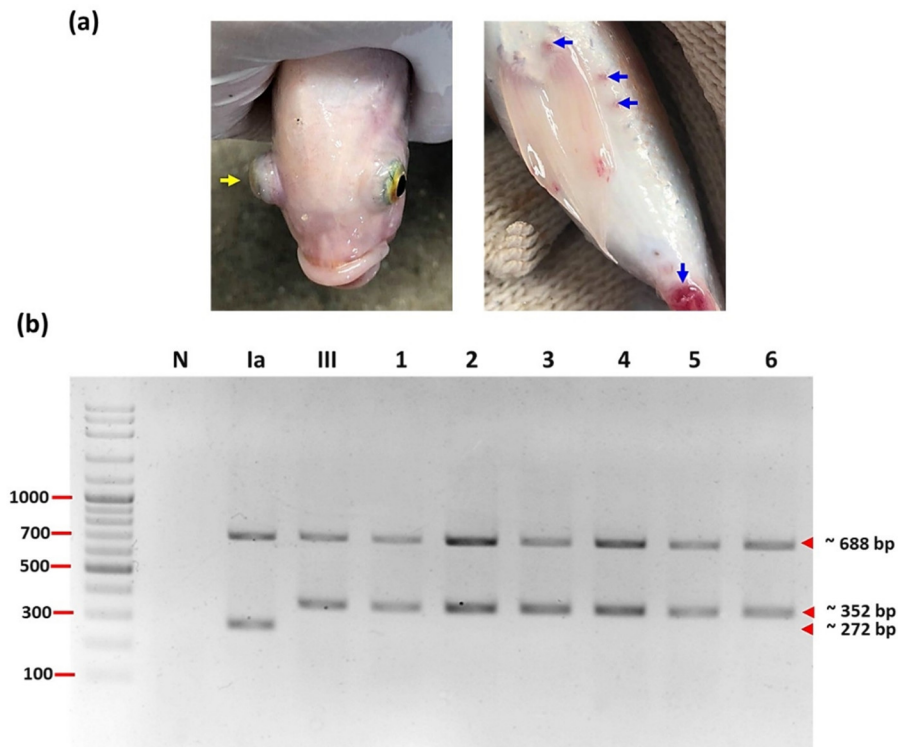

**Figure S6.** The agarose gel electrophoresis demonstrating the multiplex PCR to confirm *S. agalactiae* serotype III infection and the noticeable symptoms after infection. (a) The exophthalmia and abscess symptoms were indicated at yellow and blue arrows, respectively. (N = negative, Ia = positive for *S. agalactiae* serotype Ia, III = positive for *S. agalactiae* serotype III, 1-6 = number of fish samples). (b) The specific bands of *S. agalactiae* serotype III were indicated at approximately 688 bp and 352 bp.
